# Supplementary material for: Phytochemical Compositions and Antioxidant Activities of Essential Oils Extracted from the Flowers of Paeonia delavayi Using Supercritical Carbon Dioxide Fluid
Source: MDPI journal article supplement (doi:10.3390/molecules27093000), 2022-05-07
Supplement: s1 [file s1]

**Content:**

**Table S1.** Physical and chemical properties of essential oil from *P. delavayi* flowers with different colors

**Table S2.** Essential oil composition of *P. delavayi* flower with different colors

**Table S3.** Eigenvalues and contribution rates of principal components

**Table S4.** Principal component load matrix

**Figure S1.** GC-MS total ion chromatogram of essential oil from *P. delavayi* flowers with different colors (A: Dark-purple petals B:Red petals C:Yellow petals)

**Figure S2.** Test materials of dark-purple , red and yellow flowers of *P. delavayi*

**Table S1** Physical and chemical properties of essential oil from *P. delavayi* flowers with different colors

| Petal Color | Yield/%       | Appearance   | Tincture    | Fragrance          | Relative density | Optical rotation | Dioppter      |
|-------------|---------------|--------------|-------------|--------------------|------------------|------------------|---------------|
| Dark-purple | 0.78 ± 0.02a  | Clear liquid | Milk white  | Superfine fragrant | 0.90 ± 0.035ab   | -3.78° ± 0.33b   | 1.47 ± 0.14a  |
| Red         | 0.64 ± 0.01ab | Clear liquid | Milk white  | Superfine fragrant | 0.85 ± 0.028a    | -2.98° ± 0.77b   | 1.46 ± 0.26b  |
| Yellow      | 0.58 ± 0.07a  | Clear liquid | Pale Yellow | Delicate fragrance | 0.80 ± 0.046bc   | -3.14° ± 0.48ab  | 1.46 ± 0.07ab |

Notes: mean ± SD (n = 3). Identical letters indicate not significant difference (P > 0.05).

**Table S2** Essential oil composition of *P. delavayi* flower with different colors

| Compound type | Retention time/min | Compounds                                                                     | Molecular formula                               | Relative content/% |               |               |
|---------------|--------------------|-------------------------------------------------------------------------------|-------------------------------------------------|--------------------|---------------|---------------|
|               |                    |                                                                               |                                                 | Dark-purple        | Red           | Yellow        |
| Alcohol       | 3.78               | Cyclobutanemethanol                                                           | C <sub>5</sub> H <sub>10</sub> O                | 0.00b              | 0.00b         | 0.20a ± 0.02  |
|               | 4.01               | (S,S)-2,3-Butanediol                                                          | C <sub>4</sub> H <sub>10</sub> O <sub>2</sub>   | 0.00a              | 0.10b ± 0.03  | 0.00a         |
|               | 5.30               | Leaf alcohol                                                                  | C <sub>6</sub> H <sub>12</sub> O                | 0.00a              | 0.34b ± 0.04  | 0.00a         |
|               | 5.62               | 1-Hexanol                                                                     | C <sub>6</sub> H <sub>14</sub> O                | 0.00a              | 0.14b ± 0.01  | 0.00a         |
|               | 5.28               | Trans-3-Hexen-1-ol                                                            | C <sub>6</sub> H <sub>12</sub> O                | 0.35a ± 0.07       | 0.00b         | 0.38ac ± 0.04 |
|               | 14.21              | Benzyl alcohol                                                                | C <sub>7</sub> H <sub>8</sub> O                 | 2.24a ± 0.97       | 3.24a ± 1.00  | 3.44a ± 0.86  |
|               | 15.71              | DI-1-Phenethylalcohol                                                         | C <sub>8</sub> H <sub>10</sub> O                | 0.00b              | 0.61ab ± 0.04 | 5.97c ± 0.83  |
|               | 17.26              | 7-Octen-2-ol, 2-Methyl-6-methylene                                            | C <sub>10</sub> H <sub>18</sub> O               | 0.00b              | 1.70a ± 0.41  | 0.00b         |
|               | 18.02              | Linalool                                                                      | C <sub>10</sub> H <sub>18</sub> O               | 0.00a              | 1.00c ± 0.26  | 0.58b         |
|               | 18.58              | Phenethyl alcohol                                                             | C <sub>8</sub> H <sub>10</sub> O                | 1.76ab ± 0.51      | 0.80a ± 0.15  | 2.06bc ± 0.92 |
|               | 23.00              | 2,6-Dimethyl-3,7-octadiene-2,6-diol                                           | C <sub>10</sub> H <sub>18</sub> O <sub>2</sub>  | 0.00a              | 0.00a         | 0.24b ± 0.08  |
|               | 24.98              | 3-Phenyl-1-propanol                                                           | C <sub>9</sub> H <sub>12</sub> O                | 2.68a ± 0.43       | 2.31ac ± 0.61 | 0.00b         |
|               | 25.83              | 2-(4-methylidenecyclohexyl)prop-2-en-1-ol                                     | C <sub>10</sub> H <sub>16</sub> O               | 0.00a              | 0.00a         | 2.54b ± 0.92  |
|               | 26.30              | Lavandulol                                                                    | C <sub>10</sub> H <sub>18</sub> O               | 0.05ab ± 0.03      | 0.00b         | 0.00b         |
|               | 26.21              | Geraniol                                                                      | C <sub>10</sub> H <sub>18</sub> O               | 0.00a              | 0.00a         | 1.84b ± 0.41  |
|               | 26.87              | 4-Isopropyl-1,5-cyclohexadiene-1-methanol                                     | C <sub>10</sub> H <sub>16</sub> O               | 0.00a              | 0.00a         | 0.53b ± 0.08  |
|               | 27.33              | (βR,2S,5S)-β,5-Dimethyl-5β-vinyltetrahydrofuran-2α-ethanol                    | C <sub>10</sub> H <sub>18</sub> O <sub>2</sub>  | 0.29a ± 0.03       | 0.18ab ± 0.08 | 0.00c         |
|               | 27.86              | Epoxydihydrolinalool                                                          | C <sub>10</sub> H <sub>18</sub> O <sub>3</sub>  | 1.21a ± 0.28       | 0.60b ± 0.07  | 0.00b         |
|               | 29.03              | Cinnamyl alcohol                                                              | C <sub>9</sub> H <sub>10</sub> O                | 1.36a ± 0.63       | 0.29b ± 0.13  | 0.00b         |
|               | 29.15              | β-Methylenephenethyl alcohol                                                  | C <sub>9</sub> H <sub>10</sub> O                | 0.00a              | 5.60b ± 1.05  | 0.00a         |
|               | 30.40              | 2,6-dimethyloct-7-ene-2,6-diol                                                | C <sub>10</sub> H <sub>20</sub> O <sub>2</sub>  | 0.86a ± 0.24       | 1.49bc ± 0.83 | 0.00b         |
|               | 30.98              | 4-(Allyloxy)-2-methyl-2-pentanol                                              | C <sub>9</sub> H <sub>18</sub> O <sub>2</sub>   | 0.00a              | 0.30b ± 0.07  | 0.00ac        |
|               | 31.13              | 3-Ethyl-2-methyl-2-heptanol                                                   | C <sub>10</sub> H <sub>22</sub> O               | 0.00a              | 0.02b ± 0.02  | 0.00ab        |
|               | 32.62              | 2,2-Difluoro-1,3-benzodioxole-4-carbonyl chloride                             | C <sub>10</sub> H <sub>18</sub> O <sub>2</sub>  | 0.33a ± 0.09       | 0.00b         | 0.00bc        |
|               | 38.97              | (S,3E,7E)-α,α,4,8-Tetramethyl-3,7-cyclodecadiene-1-methanol                   | C <sub>15</sub> H <sub>26</sub> O               | 0.42ab ± 0.13      | 0.38ab ± 0.17 | 2.50c ± 0.35  |
|               | 40.20              | 1,4-Dichloro-2-butanol                                                        | C <sub>4</sub> H <sub>8</sub> Cl <sub>2</sub> O | 0.00a              | 0.00a         | 0.12ab ± 0.08 |
|               | 42.52              | (1S)-1,6-Dimethyl-4β-isopropyl-1,2,3,4,4aβ,7,8,8aβ-octahydronaphthalene-1β-ol | C <sub>15</sub> H <sub>26</sub> O               | 0.00a              | 0.94b ± 0.15  | 0.00a         |

|       |        |                                                                                |                                                                |                    |                    |                   |
|-------|--------|--------------------------------------------------------------------------------|----------------------------------------------------------------|--------------------|--------------------|-------------------|
|       | 42.91  | 10-epi- $\gamma$ -eudesmol                                                     | C <sub>15</sub> H <sub>26</sub> O                              | 0.00a              | 0.18ab $\pm$ 0.07  | 0.00a             |
|       | 42.99  | $\alpha$ -cadinol                                                              | C <sub>15</sub> H <sub>26</sub> O                              | 1.11a $\pm$ 0.38   | 0.94ab $\pm$ 0.26  | 4.30c $\pm$ 0.85  |
|       | 43.45  | 2-(4a,8-Dimethyl-2,3,4,5,6,7-hexahydro-1H-naphthalen-2-yl)propan-2-ol          | C <sub>15</sub> H <sub>26</sub> O                              | 0.00a              | 0.00a              | 0.48ab $\pm$ 0.13 |
|       | 43.463 | 10-epi- $\gamma$ -Eudesmol                                                     | C <sub>15</sub> H <sub>26</sub> O                              | 0.06a $\pm$ 0.03   | 0.00a              | 0.00a             |
|       | 48.72  | Cryptomeridiol                                                                 | C <sub>15</sub> H <sub>28</sub> O <sub>2</sub>                 | 0.00a              | 3.11b $\pm$ 0.87   | 0.00a             |
|       | 48.93  | 1-(2-Methoxyphenyl)-2-propanol                                                 | C <sub>10</sub> H <sub>14</sub> O <sub>2</sub>                 | 0.15ab $\pm$ 0.07  | 0.00a              | 0.00a             |
|       | 50.09  | 2-Isopropyl-4a-methyl-8-methylenedecahydro-1,5-naphthalenediol                 | C <sub>15</sub> H <sub>26</sub> O <sub>2</sub>                 | 0.00a              | 0.51b $\pm$ 0.13   | 0.00a             |
|       | 50.07  | 3-Isopropyl-6,7-dimethyltricyclo[4.4.0.0(2,8)]decane-9,10-diol                 | C <sub>15</sub> H <sub>26</sub> O <sub>2</sub>                 | 1.05a $\pm$ 0.41   | 0.00b              | 1.38ac $\pm$ 0.72 |
|       | 51.13  | 4,4-Dimethyladamantan-2-ol                                                     | C <sub>12</sub> H <sub>20</sub> O                              | 0.65a $\pm$ 0.16   | 0.59a $\pm$ 0.08   | 0.00b             |
|       | 58.34  | Phytol                                                                         | C <sub>20</sub> H <sub>40</sub> O                              | 2.15a $\pm$ 0.58   | 3.48ac $\pm$ 0.73  | 2.51ab $\pm$ 0.62 |
| Ester | 3.33   | Resorcinol monobenzoate                                                        | C <sub>13</sub> H <sub>10</sub> O <sub>3</sub>                 | 0.00a              | 0.00a              | 0.11ab $\pm$ 0.08 |
|       | 19.77  | 3-Methylbut-2-enoic acid, 3-fluorophenyl ester                                 | C <sub>8</sub> H <sub>20</sub> O <sub>4</sub> Si               | 0.14a $\pm$ 0.08   | 0.10a $\pm$ 0.06   | 0.00c             |
|       | 16.23  | 2-(5-Ethenyl-5-methyloxolan-2-yl)propan-2-ol                                   | C <sub>13</sub> H <sub>22</sub> O <sub>4</sub>                 | 20.88ab $\pm$ 1.64 | 21.81ab $\pm$ 1.04 | 4.06c $\pm$ 0.82  |
|       | 18.06  | Phosphonofluoridic acid, (1-methylethyl)-, octyl ester                         | C <sub>11</sub> H <sub>24</sub> FO <sub>2</sub> P              | 0.88a $\pm$ 0.25   | 0.00b              | 0.00b             |
|       | 19.77  | 3-Methylbut-2-enoic acid, 3-fluorophenyl ester                                 | C <sub>11</sub> H <sub>11</sub> FO <sub>2</sub>                | 0.02a $\pm$ 0.01   | 0.00a              | 0.00a             |
|       | 22.50  | Crotonic acid cis-3-hexen-1-yl ester                                           | C <sub>10</sub> H <sub>16</sub> O <sub>2</sub>                 | 0.00a              | 0.00a              | 0.12b0.08         |
|       | 22.84  | Methyl salicylate                                                              | C <sub>8</sub> H <sub>8</sub> O <sub>3</sub>                   | 0.00a              | 0.00a              | 0.19ab $\pm$ 0.05 |
|       | 23.16  | Cyclooctyl isopropylphosphonofluoridate                                        | C <sub>11</sub> H <sub>22</sub> FO <sub>2</sub> P              | 0.00a              | 5.16b $\pm$ 0.85   | 0.00a             |
|       | 23.22  | Isopropylphosphonic acid, fluoroanhydride, 1-methylheptyl ester                | C <sub>11</sub> H <sub>24</sub> FO <sub>2</sub> P              | 3.40a $\pm$ 0.62   | 0.00b              | 0.00b             |
|       | 24.77  | Butyric acid, 2-phenyl-, 3-methylbut-2-en-1-yl ester                           | C <sub>15</sub> H <sub>20</sub> O <sub>2</sub>                 | 0.00a              | 0.00a              | 0.19ab $\pm$ 0.04 |
|       | 25.43  | 2-Chloroethyl benzoate                                                         | C <sub>9</sub> H <sub>9</sub> ClO <sub>2</sub>                 | 0.00a              | 0.32b $\pm$ 0.08   | 0.00a             |
|       | 25.77  | 2,3-Dipropyl-cyclopropanecarboxylic acid, ethyl ester                          | C <sub>12</sub> H <sub>22</sub> O <sub>2</sub>                 | 2.15a $\pm$ 0.38   | 0.00b              | 0.00b             |
|       | 26.31  | Acetic acid, 2,2,2-trifluoro-, 5-methyl-2-(1-methylethenyl)-4-hexen-1-yl ester | C <sub>12</sub> H <sub>17</sub> F <sub>3</sub> O <sub>2</sub>  | 0.00a              | 0.19ab $\pm$ 0.07  | 0.07a $\pm$ 0.02  |
|       | 26.44  | Ethyl 2-AMinoimidazole-5-carboxylate                                           | C <sub>6</sub> H <sub>9</sub> N <sub>3</sub> O <sub>2</sub>    | 0.00a              | 0.62b $\pm$ 0.15   | 0.00a             |
|       | 26.45  | Methyl chlorodifluoroacetate                                                   | C <sub>3</sub> H <sub>3</sub> ClF <sub>2</sub> O <sub>2</sub>  | 1.15a $\pm$ 0.31   | 0.00b              | 0.00b             |
|       | 30.45  | Cyclobutanecarboxylic acid, 2-tetrahydrofurylmethyl ester                      | C <sub>10</sub> H <sub>16</sub> O <sub>3</sub>                 | 0.00a              | 0.00a              | 0.08a $\pm$ 0.02  |
|       | 31.57  | Ethyl 2,4-dioxo-4-p-tolylbutanoate                                             | C <sub>13</sub> H <sub>14</sub> O <sub>4</sub>                 | 0.00a              | 0.00a              | 0.25b $\pm$ 0.09  |
|       | 31.74  | (2Z)-2-Butenoic acid methyl ester                                              | C <sub>5</sub> H <sub>8</sub> O <sub>2</sub>                   | 0.00a              | 0.09ab $\pm$ 0.03  | 0.00a             |
|       | 35.23  | Oxalic acid, 2-isopropylphenyl octyl ester                                     | C <sub>19</sub> H <sub>28</sub> O <sub>4</sub>                 | 0.00a              | 0.00a              | 0.51b $\pm$ 0.13  |
|       | 35.56  | Ethyl 3-phenylacrylate                                                         | C <sub>11</sub> H <sub>12</sub> O <sub>2</sub>                 | 0.10a $\pm$ 0.04   | 0.00b              | 0.00b             |
|       | 37.26  | 4-Bromobutanoic acid, 1-adamantylmethyl ester                                  | C <sub>15</sub> H <sub>23</sub> BrO <sub>2</sub>               | 0.00a              | 0.00a              | 0.40b $\pm$ 0.08  |
|       | 37.29  | L-Proline, N-(2-methoxybenzoyl)-, isohexyl ester                               | C <sub>19</sub> H <sub>27</sub> NO <sub>4</sub>                | 0.04a $\pm$ 0.01   | 0.00b              | 0.00b             |
|       | 37.66  | Pentanoic acid, 5-hydroxy-, 2,4-bis(1,1-dimethylethyl)phenyl ester             | C <sub>19</sub> H <sub>30</sub> O <sub>3</sub>                 | 0.00a              | 0.28bc $\pm$ 0.09  | 0.42bc $\pm$ 0.12 |
|       | 38.68  | L-Alanine, N-(2,3,4-trifluorobenzoyl)-, methyl ester                           | C <sub>11</sub> H <sub>10</sub> F <sub>3</sub> NO <sub>3</sub> | 0.00a              | 0.03ab $\pm$ 0.01  | 0.00a             |
|       | 44.08  | 2-Furanethanol, $\alpha$ -methyl-, 2-acetate                                   | C <sub>9</sub> H <sub>12</sub> O <sub>3</sub>                  | 0.00a              | 0.30bc $\pm$ 0.07  | 0.00a             |
|       | 45.76  | Methyl pentyl methylphosphonate                                                | C <sub>7</sub> H <sub>17</sub> O <sub>3</sub> P                | 0.00a              | 0.00a              | 0.16b $\pm$ 0.05  |
|       | 45.84  | Phosphonic acid,methyl-,bis(1-methylheptyl) ester                              | C <sub>17</sub> H <sub>37</sub> O <sub>3</sub> P               | 0.29b $\pm$ 0.08   | 0.00a              | 0.00a             |

|       |                                                                                     |                                                               |               |               |               |
|-------|-------------------------------------------------------------------------------------|---------------------------------------------------------------|---------------|---------------|---------------|
| 48.92 | 5-(1-Hydroxyethylidene)-2-methyl-1,3-cyclopentadiene-1-carboxylic acid methyl ester | C <sub>10</sub> H <sub>12</sub> O <sub>3</sub>                | 0.00a         | 0.00a         | 0.05ab ± 0.01 |
| 51.74 | Tributyl citrate                                                                    | C <sub>18</sub> H <sub>32</sub> O <sub>7</sub>                | 0.00a         | 0.00a         | 0.25b ± 0.08  |
| 51.66 | 5-Tridecanol, 5-acetate                                                             | C <sub>15</sub> H <sub>30</sub> O <sub>2</sub>                | 0.43bc ± 0.11 | 0.00a         | 0.00a         |
| 51.67 | Prop-2-yn-1-yl 2-methylbutanoate                                                    | C <sub>8</sub> H <sub>12</sub> O <sub>2</sub>                 | 0.13a ± 0.07  | 0.00b         | 0.00b         |
| 53.50 | Dibutyl phthalate                                                                   | C <sub>16</sub> H <sub>22</sub> O <sub>4</sub>                | 0.31a ± 0.09  | 0.00b         | 0.00b         |
| 54.16 | Phthalic acid, cyclobutyl tridecyl ester                                            | C <sub>25</sub> H <sub>38</sub> O <sub>4</sub>                | 0.00a         | 0.04ab ± 0.02 | 0.00a         |
| 54.59 | Palmitic acid ethyl ester                                                           | C <sub>18</sub> H <sub>36</sub> O <sub>2</sub>                | 0.08a ± 0.02  | 0.04a ± 0.01  | 0.00ab        |
| 54.58 | Sulfurous acid, nonyl pentyl ester                                                  | C <sub>14</sub> H <sub>30</sub> O <sub>3</sub> S              | 0.00a         | 0.00a         | 1.12b ± 0.24  |
| 56.61 | Myristic acid, phenyl ester                                                         | C <sub>20</sub> H <sub>32</sub> O <sub>2</sub>                | 0.00a         | 0.32b ± 0.08  | 0.00a         |
| 57.66 | 2-Thiopheneacetic acid, 2-ethylcyclohexyl ester                                     | C <sub>14</sub> H <sub>20</sub> O <sub>2</sub> S              | 0.00a         | 0.06ab ± 0.02 | 0.00a         |
| 61.61 | Succinic acid, 1,1,1-trifluoroprop-2-yl 2,4-dimethylpent-3-yl ester                 | C <sub>14</sub> H <sub>23</sub> F <sub>3</sub> O <sub>4</sub> | 0.00a         | 0.11b ± 0.03  | 0.00a         |
| 5.60  | 1-Cyclopropylpropane                                                                | C <sub>6</sub> H <sub>12</sub>                                | 0.15ab0.08    | 0.00a         | 0.11ab0.06    |
| 17.62 | Hexaldehyde diethyl acetal                                                          | C <sub>10</sub> H <sub>22</sub> O <sub>2</sub>                | 0.00a         | 0.00a         | 0.08b ± 0.02  |
| 20.59 | 1-Bromo-1,2-dichlorocyclopropane                                                    | C <sub>3</sub> H <sub>3</sub> BrCl <sub>2</sub>               | 0.13ab ± 0.05 | 0.05a         | 0.00a         |
| 26.59 | 1,1,3,3,5-Pentamethylcyclohexane                                                    | C <sub>11</sub> H <sub>22</sub>                               | 0.00a         | 0.00a         | 0.23ab ± 0.08 |
| 35.17 | 2,6,10-trimethyldodecane                                                            | C <sub>15</sub> H <sub>32</sub>                               | 1.09a ± 0.25  | 0.87a ± 0.18  | 0.00b         |
| 36.18 | (±)-β-Copaene                                                                       | C <sub>15</sub> H <sub>24</sub>                               | 0.00a         | 0.00a         | 20.34b ± 1.34 |
| 36.75 | 1-methyl-4-(1-methylethylidene)-2-(1-methylvinyl)-1-vinylcyclohexane                | C <sub>15</sub> H <sub>24</sub>                               | 0.00a         | 0.00a         | 1.82b0.27     |
| 41.19 | 3,3-Dimethylhexane                                                                  | C <sub>8</sub> H <sub>18</sub>                                | 0.00a         | 0.13b ± 0.04  | 0.13b ± 0.07  |
| 44.64 | N-heptadecane                                                                       | C <sub>17</sub> H <sub>36</sub>                               | 0.00a         | 0.26b ± 0.08  | 0.00a         |
| 46.68 | 2-Methyl-3-(3-methyl-but-2-enyl)-2-(4-methyl-pent-3-enyl)-oxetane                   | C <sub>15</sub> H <sub>26</sub> O                             | 0.00a         | 0.09ab ± 0.02 | 0.00a         |
| 48.00 | germacrane                                                                          | C <sub>15</sub> H <sub>30</sub>                               | 0.00a         | 0.25b ± 0.08  | 0.00a         |
| 50.45 | Tri(n-butyl)difluorophosphorane                                                     | C <sub>12</sub> H <sub>27</sub> F <sub>2</sub> P              | 0.00a         | 0.00a         | 0.74b ± 0.13  |
| 51.54 | N-nonadecane                                                                        | C <sub>19</sub> H <sub>40</sub>                               | 0.00a         | 0.94b ± 0.16  | 0.00a         |
| 51.13 | 4,5,6,7-Tetrahydroindazole-3-spirocyclohexane                                       | C <sub>12</sub> H <sub>18</sub> N <sub>2</sub>                | 0.00a         | 0.00a         | 0.80b ± 0.13  |
| 54.65 | N-hexadecane                                                                        | C <sub>16</sub> H <sub>34</sub>                               | 0.00a         | 1.00b ± 0.36  | 4.36c ± 0.78  |
| 54.89 | 2,2,3,3,5,6,6-Heptamethylheptane                                                    | C <sub>14</sub> H <sub>30</sub>                               | 1.07a ± 0.27  | 0.00b         | 0.00b         |
| 56.14 | 1,2-Dibromoethane                                                                   | C <sub>2</sub> H <sub>4</sub> Br <sub>2</sub>                 | 0.00a         | 0.06a ± 0.02  | 0.00a         |
| 56.90 | 8,8-Diheptylpentadecane                                                             | C <sub>29</sub> H <sub>60</sub>                               | 0.55a ± 0.13  | 0.00b         | 0.05b ± 0.02  |
| 57.34 | 2-Cyclohexyldodecane                                                                | C <sub>18</sub> H <sub>36</sub>                               | 0.00ab        | 0.09ab ± 0.03 | 0.00ab        |
| 57.88 | N-Heneicosane                                                                       | C <sub>21</sub> H <sub>44</sub>                               | 0.00a         | 0.64b ± 0.17  | 0.00a         |
| 57.70 | 1-Isopropyl-2,3-dimethylcyclopentane                                                | C <sub>10</sub> H <sub>20</sub>                               | 0.00a         | 0.00a         | 0.20b ± 0.06  |
| 57.91 | Tetracosane, 3-methyl-                                                              | C <sub>25</sub> H <sub>52</sub>                               | 0.00a         | 0.00a         | 0.26b ± 0.09  |
| 60.15 | 2-ethylbicyclo(2.2.1)heptane                                                        | C <sub>9</sub> H <sub>16</sub>                                | 0.00a         | 0.20a ± 0.05  | 0.00a         |
| 60.41 | 3-Methylpentane                                                                     | C <sub>26</sub> H <sub>54</sub>                               | 0.00a         | 2.93b ± 0.83  | 0.00a         |
| 61.63 | 6,6-Dimethylundecane                                                                | C <sub>13</sub> H <sub>28</sub>                               | 0.00a         | 0.00a         | 0.06a ± 0.02  |
| 3.15  | Acetoin                                                                             | C <sub>4</sub> H <sub>8</sub> O <sub>2</sub>                  | 0.00a         | 0.03a ± 0.01  | 0.00a         |
| 20.39 | 1-Hepten-3-one                                                                      | C <sub>7</sub> H <sub>12</sub> O                              | 0.00a         | 0.00a         | 0.06a ± 0.03  |
| 21.09 | 4-Chloro-4'-hydroxybutyrophenone                                                    | C <sub>10</sub> H <sub>11</sub> ClO <sub>2</sub>              | 0.11ab ± 0.07 | 0.00b         | 0.14ab ± 0.09 |
| 28.61 | Bicyclo[3.2.2]nona-6,8-dien-3-one                                                   | C <sub>9</sub> H <sub>10</sub> O                              | 0.60a ± 0.17  | 0.79a ± 0.08  | 0.60a ± 0.13  |

|          |       |                                                                                                                    |                                                |             |             |             |
|----------|-------|--------------------------------------------------------------------------------------------------------------------|------------------------------------------------|-------------|-------------|-------------|
| Ketone   | 36.46 | 4-Methoxy-3-hydroxyacetophenone                                                                                    | C <sub>9</sub> H <sub>10</sub> O <sub>3</sub>  | 0.26a±0.05  | 0.12a±0.03  | 0.00b       |
|          | 43.95 | 2,3-Dihydro-8-methyl-4H-1-benzothiopyran-4-one                                                                     | C <sub>10</sub> H <sub>10</sub> OS             | 0.00a       | 0.18b±0.08  | 0.00a       |
|          | 43.92 | 6-Methoxy-4-chromanone                                                                                             | C <sub>10</sub> H <sub>10</sub> O <sub>3</sub> | 0.12ab±0.04 | 0.00b       | 0.00b       |
|          | 47.95 | 3'-Hydroxyacetophenone                                                                                             | C <sub>8</sub> H <sub>8</sub> O <sub>2</sub>   | 0.00a       | 0.00a       | 0.10a±0.02  |
|          | 49.75 | Fitone                                                                                                             | C <sub>18</sub> H <sub>36</sub> O              | 4.34c±0.52  | 2.20ab±0.37 | 2.02ab±0.28 |
|          | 52.33 | Carissone                                                                                                          | C <sub>15</sub> H <sub>24</sub> O <sub>2</sub> | 0.00a       | 0.27bc±0.11 | 0.51bc±0.14 |
|          | 56.77 | 2,5-dimethyl-3-hexanone                                                                                            | C <sub>8</sub> H <sub>16</sub> O               | 0.02a±0.01  | 0.00a       | 0.00a       |
| Aldehyde | 4.10  | 2-methylpent-4-enal                                                                                                | C <sub>6</sub> H <sub>10</sub> O               | 0.16a±0.05  | 0.00a       | 1.85c±0.14  |
|          | 5.19  | Trans-2-hexenal                                                                                                    | C <sub>6</sub> H <sub>10</sub> O               | 0.14b±0.09  | 0.00a       | 0.79bc±0.17 |
|          | 9.30  | Benzaldehyde                                                                                                       | C <sub>7</sub> H <sub>6</sub> O                | 0.15a±0.04  | 0.17a±0.07  | 0.10a±0.02  |
|          | 14.42 | 2-Phenyl-2-butenal                                                                                                 | C <sub>8</sub> H <sub>8</sub> O                | 0.00a       | 0.20b±0.04  | 0.00a       |
|          | 14.26 | Salicylaldehyde                                                                                                    | C <sub>7</sub> H <sub>6</sub> O <sub>2</sub>   | 0.00a       | 0.00a       | 0.49b±0.12  |
|          | 18.18 | 1-Nonanal                                                                                                          | C <sub>9</sub> H <sub>18</sub> O               | 0.18ab±0.04 | 0.24ab±0.08 | 0.00c       |
|          | 22.56 | 6,6-dimethylbicyclo[3.1.1]heptane-2-carbaldehyde                                                                   | C <sub>10</sub> H <sub>16</sub> O              | 0.23a±0.07  | 0.12a±0.04  | 0.00c       |
|          | 26.73 | Trans-Cinnamaldehyde                                                                                               | C <sub>9</sub> H <sub>8</sub> O                | 4.92a±0.64  | 4.31a±0.81  | 0.33b±0.06  |
|          | 28.72 | 2-Ethylbenzaldehyde                                                                                                | C <sub>9</sub> H <sub>10</sub> O               | 0.18a±0.05  | 0.00b       | 0.00b       |
|          | 29.06 | Phenylpropyl aldehyde                                                                                              | C <sub>9</sub> H <sub>10</sub> O               | 8.46a±1.37  | 0.30bc±0.08 | 0.00c       |
|          | 55.37 | Pentadecanal                                                                                                       | C <sub>15</sub> H <sub>30</sub> O              | 0.00a       | 0.19ab±0.07 | 0.00a       |
| Terpenes | 19.71 | IsoliMonene                                                                                                        | C <sub>10</sub> H <sub>18</sub>                | 0.00a       | 0.00a       | 0.13ab±0.05 |
|          | 24.35 | Myrcene                                                                                                            | C <sub>10</sub> H <sub>16</sub>                | 0.00a       | 0.00a       | 1.07b±0.35  |
|          | 28.23 | (E)-3,7-dimethylocta-1,3,6-triene                                                                                  | C <sub>10</sub> H <sub>16</sub>                | 0.00a       | 0.00a       | 0.58b±0.16  |
|          | 28.24 | 3,6,6-Trimethyl-2-norpinene                                                                                        | C <sub>10</sub> H <sub>16</sub>                | 0.00a       | 0.29a±0.04  | 0.00a       |
|          | 28.27 | 2,5-Dimethyl-3-vinyl-1,4-hexadiene                                                                                 | C <sub>10</sub> H <sub>16</sub>                | 0.35a±0.11  | 0.00a       | 0.00a       |
|          | 29.08 | Cis-Bicyclo[4.2.0]octa-3,7-diene                                                                                   | C <sub>8</sub> H <sub>10</sub>                 | 0.06a±0.02  | 0.00a       | 0.00a       |
|          | 32.24 | Cis-muurolo-4(14),5-diene                                                                                          | C <sub>15</sub> H <sub>24</sub>                | 0.00a       | 0.17bc±0.05 | 0.30b±0.08  |
|          | 33.47 | (-)-isocaryophyllene                                                                                               | C <sub>15</sub> H <sub>24</sub>                | 0.00a       | 0.00a       | 1.66b±0.34  |
|          | 34.93 | Alpha-caryophyllene                                                                                                | C <sub>15</sub> H <sub>24</sub>                | 0.00a       | 0.00a       | 1.37b±0.25  |
|          | 36.14 | (1E,6E,8S)-1-Methyl-5-methylene-8-isopropyl-1,6-cyclodecadiene                                                     | C <sub>15</sub> H <sub>24</sub>                | 1.74ab±0.27 | 1.35ab±0.47 | 0.00b       |
|          | 36.76 | Bicyclo[3.1.1]hept-2-ene,3                                                                                         | C <sub>10</sub> H <sub>16</sub>                | 0.00a       | 0.18ab±0.09 | 0.00a       |
|          | 37.49 | C <sub>15</sub> H <sub>24</sub> , Naphthalene, 1,2,3,4,4a,5,6,8a-octahydro-7-methyl-4-methylene-1-(1-methylethyl)- | C <sub>15</sub> H <sub>24</sub>                | 0.00a       | 0.00a       | 1.06b±0.38  |
|          | 37.89 | (+)-delta-Cadinene                                                                                                 | C <sub>15</sub> H <sub>24</sub>                | 0.00a       | 0.00a       | 0.98b±0.15  |
|          | 42.52 | Cis-8-Isopropylbicyclo[4.3.0]non-3-ene                                                                             | C <sub>12</sub> H <sub>20</sub>                | 0.00a       | 0.00a       | 1.24b±0.32  |
|          | 43.67 | 2,5,5-Trimethyl-1-hexene                                                                                           | C <sub>9</sub> H <sub>18</sub>                 | 0.00a       | 0.11ab±0.02 | 0.00a       |
|          | 45.86 | (1S,8α)-Decahydro-3α-methyl-7-methylene-1-isopropyl-4α,8α-epithioazulene                                           | C <sub>15</sub> H <sub>24</sub> S              | 0.00a       | 0.00a       | 0.25b±0.06  |
|          | 50.59 | 7R,8R-8-Hydroxy-4-isopropylidene-7-methylbicyclo[5.3.1]undec-1-ene                                                 | C <sub>15</sub> H <sub>24</sub> O              | 0.49a±0.08  | 0.00b       | 0.00b       |
|          | 57.75 | Z-12-Pentacosene                                                                                                   | C <sub>25</sub> H <sub>50</sub>                | 0.00a       | 0.00a       | 1.93±0.41   |
| Phenols  | 30.96 | (Z)-2-methoxy-4-(prop-1-enyl)phenol                                                                                | C <sub>10</sub> H <sub>12</sub> O <sub>2</sub> | 0.32a±0.08  | 0.00b       | 0.00b       |

|        |        |                                                                                               |                                                                     |             |              |            |
|--------|--------|-----------------------------------------------------------------------------------------------|---------------------------------------------------------------------|-------------|--------------|------------|
| Others | 42.484 | (1S)-1,2,3,4,4aβ,7,8,8aα-Octahydro-1,6-dimethyl-4β-isopropyl-1-naphthol                       | C <sub>15</sub> H <sub>26</sub> O                                   | 0.68a±0.13  | 0.00b        | 0.00b      |
|        | 3.93   | N,N-Dimethylformamide                                                                         | C <sub>3</sub> H <sub>7</sub> NO                                    | 0.00a       | 0.49b±0.09   | 0.00a      |
|        | 17.33  | Pyrrole-2-carboxylic acid                                                                     | C <sub>5</sub> H <sub>5</sub> NO <sub>2</sub>                       | 3.81a±0.54  | 0.00b        | 0.00b      |
|        | 21.75  | (E)-linalool oxide (pyranoid)                                                                 | C <sub>10</sub> H <sub>18</sub> O <sub>2</sub>                      | 11.90a±1.45 | 10.85ac±1.26 | 0.97b±0.14 |
|        | 25.75  | 4-Hexenoic acid, 2-acetyl-2-methyl-, ethyl ester, (E)- (9CI)                                  | C <sub>11</sub> H <sub>18</sub> O <sub>3</sub>                      | 0.00a       | 0.89b±0.16   | 0.00a      |
|        | 25.90  | 3,5-Methanocyclopentapyrazole, 3,3a,4,5,6,6a-hexahydro-3a,4,4-trimethyl-                      | C <sub>10</sub> H <sub>16</sub> N <sub>2</sub>                      | 0.00a       | 0.56b±0.12   | 0.00a      |
|        | 26.44  | 1,2-Benzenediol, O-(5-chlorovaleryl)-O'-(1-naphthoyl)-                                        | C <sub>22</sub> H <sub>19</sub> ClO <sub>4</sub>                    | 1.01a±0.27  | 0.00b        | 0.00b      |
|        | 28.70  | 2-phenylpropylamine                                                                           | C <sub>9</sub> H <sub>13</sub> N                                    | 0.28a±0.04  | 0.00b        | 0.00b      |
|        | 28.73  | Benzenepropanoic acid, 2-methyl-3-nitrophenyl ester                                           | C <sub>16</sub> H <sub>15</sub> NO <sub>4</sub>                     | 0.04a±0.01  | 0.00b        | 0.00b      |
|        | 28.78  | 1-Indano                                                                                      | C <sub>9</sub> H <sub>10</sub> O                                    | 0.50a±0.12  | 0.00b        | 0.00b      |
|        | 28.79  | Butylbenzene                                                                                  | C <sub>10</sub> H <sub>14</sub>                                     | 0.00a       | 3.97b±0.57   | 0.00a      |
|        | 28.80  | 2-Methyl-3-nitrophenyl .beta.-phenylpropionate                                                | C <sub>16</sub> H <sub>15</sub> NO <sub>4</sub>                     | 0.18a±0.05  | 0.00b        | 0.00b      |
|        | 29.79  | 1,3-Oxathiolane, 2,2-dimethyl-                                                                | C <sub>5</sub> H <sub>10</sub> OS                                   | 0.00a       | 0.04a±0.01   | 0.00a      |
|        | 30.63  | 2,7-Octadiene-1,6-diol, 2,6-dimethyl-, (2Z)-                                                  | C <sub>10</sub> H <sub>18</sub> O <sub>2</sub>                      | 0.19a±0.03  | 0.00b        | 0.19a±0.05 |
|        | 31.51  | 2,7-Octadiene-1,6-diol,2,6-dimethyl-                                                          | C <sub>10</sub> H <sub>18</sub> O <sub>2</sub>                      | 1.54a±0.27  | 2.06b±0.45   | 0.00c      |
|        | 33.48  | Bicyclo[5.2.0]nonane, 4-ethenyl-4,8,8-trimethyl-2-methylene-                                  | C <sub>15</sub> H <sub>24</sub>                                     | 0.22ab±0.05 | 0.23ab±0.03  | 0.00c      |
|        | 34.94  | Cyclopenta[c]pyrrole-1,3(2H,4H)-dione, 5,6-dihydro-4-hydroxy-2-methyl-                        | C <sub>8</sub> H <sub>9</sub> NO <sub>3</sub>                       | 0.80a±0.14  | 0.00b        | 0.00b      |
|        | 35.09  | Acetamide, N-(5-methoxy-2-pyrimidinyl)-                                                       | C <sub>7</sub> H <sub>9</sub> N <sub>3</sub> O <sub>2</sub>         | 0.00a       | 0.36b±0.09   | 0.00a      |
|        | 35.45  | Decane, 3,8-dimethyl-                                                                         | C <sub>12</sub> H <sub>26</sub>                                     | 0.00a       | 0.00a        | 0.29b±0.07 |
|        | 36.75  | Cyclohexane, 1-ethenyl-1-methyl-2-(1-methylethenyl)-4-(1-methylethylidene)-                   | C <sub>15</sub> H <sub>24</sub>                                     | 0.26a±0.04  | 0.00b        | 0.00b      |
|        | 37.08  | Cyclobutane, 1,2-di-1-propen-1-yl-                                                            | C <sub>10</sub> H <sub>16</sub>                                     | 0.00a       | 0.00a        | 0.04a0.01  |
|        | 37.81  | 11-Oxatetracyclo[4.2.1.1(2,5).1(3,9)]undec-7-en-10-one, 4-bromo-                              | C <sub>10</sub> H <sub>9</sub> BrO <sub>2</sub>                     | 1.08a±0.21  | 0.00b        | 0.00b      |
|        | 37.89  | 2,4,5-Imidazolidinetrione, 1-methyl-3-phenyl-                                                 | C <sub>10</sub> H <sub>8</sub> N <sub>2</sub> O <sub>3</sub>        | 0.00a       | 0.10b±0.04   | 0.00a      |
|        | 38.63  | Benzenecarboimidic acid, N-(3,4-dichlorobenzyloxy)-                                           | C <sub>14</sub> H <sub>11</sub> Cl <sub>2</sub> N<br>O <sub>2</sub> | 0.00a       | 0.00a        | 0.08a±0.02 |
|        | 42.08  | 2,5-Cyclohexadien-1-one, 2,4,4-trimethyl-3-(3-oxo-1-butenyl)-, (E)- (9CI)                     | C <sub>13</sub> H <sub>16</sub> O <sub>2</sub>                      | 0.00a       | 0.12b±0.04   | 0.00a      |
|        | 42.68  | Naphthalene, 1,2,3,4,4a,5,6,7-octahydro-4-methyl-7-methylene-1-(1-methylethyl)-, (1S,4R,4aS)- | C <sub>15</sub> H <sub>24</sub>                                     | 0.00a       | 0.00a        | 0.32b±0.09 |
|        | 44.03  | 5-Amino-1H-imidazol-4-carbonitrile                                                            | C <sub>4</sub> H <sub>4</sub> N <sub>4</sub>                        | 0.19a±0.07  | 0.00b        | 0.00b      |
|        | 44.12  | .Alpha.-(Trifluoromethyl)benzyl alcohol,1-methylpropyl ether                                  | C <sub>12</sub> H <sub>15</sub> F <sub>3</sub> O                    | 0.00a       | 0.00a        | 0.10a±0.03 |
|        | 45.74  | Benzamide, 2-hydroxy-N-2-thiazolyl-                                                           | C <sub>10</sub> H <sub>8</sub> N <sub>2</sub> O <sub>2</sub> S      | 0.00a       | 0.02a±0.01   | 0.00a      |
|        | 45.14  | Isocaproitrile                                                                                | C <sub>6</sub> H <sub>11</sub> N                                    | 0.03a±0.01  | 0.00a        | 0.00a      |
|        | 45.86  | Ethanone, 1-[2-[3-methyl-3-(5-methyl-2-furanyl)butyl]-2-oxiranyl]-                            | C <sub>14</sub> H <sub>20</sub> O <sub>3</sub>                      | 0.00a       | 0.07a±0.02   | 0.00a      |
|        | 46.63  | 1,3-Cyclohexanediol, 4,6-dimethyl-2-nitro-, monoacetate (ester), [1S-(1α,2β,3α,4β,6β)]- (9CI) | C <sub>10</sub> H <sub>17</sub> NO <sub>5</sub>                     | 0.08a±0.03  | 0.00a        | 0.00a      |
|        | 47.23  | 2-Naphthalenemethanol, decahydro-8-hydroxy-α,α,4a,8-tetramethyl-                              | C <sub>15</sub> H <sub>28</sub> O <sub>2</sub>                      | 2.81a±0.54  | 0.00b        | 0.00b      |

|       |                                                                                           |                                                  |                   |                   |                  |
|-------|-------------------------------------------------------------------------------------------|--------------------------------------------------|-------------------|-------------------|------------------|
| 47.25 | 2-Naphthalenemethanol, decahydro-8-hydroxy- $\alpha,\alpha,4\alpha,8\alpha$ -tetramethyl- | C <sub>15</sub> H <sub>28</sub> O <sub>2</sub>   | 0.00a             | 0.83ab $\pm$ 0.17 | 7.90c $\pm$ 1.24 |
| 47.91 | 2,4-Pyrimidinediamine, 6-methyl- (9CI)                                                    | C <sub>5</sub> H <sub>8</sub> N <sub>4</sub>     | 0.04a $\pm$ 0.01  | 0.00a             | 0.00a            |
| 48.97 | Pyrazine, 2,5-dimethyl-3-(2-propenyl)-                                                    | C <sub>9</sub> H <sub>12</sub> N <sub>2</sub>    | 0.00a             | 0.08a $\pm$ 0.03  | 0.00a            |
| 49.48 | 1-Vinyl-1,2,4-triazole                                                                    | C <sub>4</sub> H <sub>5</sub> N <sub>3</sub>     | 0.01a $\pm$ 0.01  | 0.00a             | 0.00a            |
| 50.60 | Benzenepropanoic acid, $\alpha,5$ -dimethyl-2-(1-methylethyl)-                            | C <sub>14</sub> H <sub>20</sub> O <sub>2</sub>   | 0.00a             | 0.00a             | 0.32b0.08        |
| 50.62 | Bicyclo[5.3.1]undec-1-en-8-ol, 7-methyl-4-(1-methylethylidene)-, [7S-(7R*,8R*)]- (9CI)    | C <sub>15</sub> H <sub>24</sub> O                | 0.00a             | 0.42b $\pm$ 0.12  | 0.00a            |
| 50.91 | 2-Nitrothiophene                                                                          | C <sub>4</sub> H <sub>3</sub> NO <sub>2</sub> S  | 0.03a $\pm$ 0.01  | 0.00a             | 0.00a            |
| 52.32 | 2H-1-Benzopyran-2-one, 6-acetyl-7-(acetyloxy)-4-methyl-                                   | C <sub>14</sub> H <sub>12</sub> O <sub>5</sub>   | 0.16ab $\pm$ 0.07 | 0.00b             | 0.00b            |
| 53.51 | 1(3H)-Isobenzofuranone, 3-ethyl-7-hydroxy-, (3S)-                                         | C <sub>10</sub> H <sub>10</sub> O <sub>3</sub>   | 0.00a             | 0.00a             | 0.38b $\pm$ 0.08 |
| 53.54 | 1,3-Cyclopentadiene, 5,5-dimethyl-1,2-Dipropyl-                                           | C <sub>13</sub> H <sub>22</sub>                  | 0.00a             | 0.44b $\pm$ 0.15  | 0.00a            |
| 54.91 | Benzene, 1-acetyl-3-ethyl-2-(2-ethenyl-6-ethylphenylazo)-                                 | C <sub>20</sub> H <sub>22</sub> N <sub>2</sub> O | 0.00a             | 0.14b $\pm$ 0.07  | 0.00a            |
| 55.44 | 1-Benzothiophene-3-carboxylic acid                                                        | C <sub>9</sub> H <sub>6</sub> O <sub>2</sub> S   | 0.05a $\pm$ 0.02  | 0.00a             | 0.08a $\pm$ 0.03 |
| 56.97 | 2-Propen-1-ol, 3-phenyl-, benzoate, (2Z)- (9CI)                                           | C <sub>16</sub> H <sub>14</sub> O <sub>2</sub>   | 0.11ab $\pm$ 0.09 | 0.00a             | 0.00a            |
| 57.63 | 1H-Imidazole, 4,5-dihydro-2-(1-methylethyl)-                                              | C <sub>6</sub> H <sub>12</sub> N <sub>2</sub>    | 0.55a $\pm$ 0.14  | 0.00b             | 0.00b            |
| 57.80 | Dimethyltrifluorophosphorane                                                              | C <sub>2</sub> H <sub>6</sub> F <sub>3</sub> P   | 0.27a $\pm$ 0.09  | 0.00b             | 0.00b            |
| 58.64 | Dodecanamide                                                                              | C <sub>12</sub> H <sub>25</sub> NO               | 0.60a $\pm$ 0.18  | 0.00b             | 0.00b            |
| 58.81 | Oleamide                                                                                  | C <sub>18</sub> H <sub>35</sub> NO               | 0.00a             | 0.00a             | 2.28b $\pm$ 0.51 |
| 59.36 | 2(5H)-Furanone, 5-(1-methylethyl)-                                                        | C <sub>7</sub> H <sub>10</sub> O <sub>2</sub>    | 0.06a $\pm$ 0.01  | 0.12ab $\pm$ 0.03 | 0.00a            |
| 60.31 | 1,4-Dioxaspiro[4.6]undecane, 6-chloro-                                                    | C <sub>9</sub> H <sub>15</sub> ClO <sub>2</sub>  | 0.00a             | 0.00a             | 0.35b $\pm$ 0.04 |
| 61.60 | Octane, 2,6,6-trimethyl-                                                                  | C <sub>11</sub> H <sub>24</sub>                  | 0.00a             | 0.00a             | 0.04a $\pm$ 0.01 |

Different letters represent significant differences between samples ( $p \leq 0.05$ )

**Table S3** Eigenvalues and contribution rates of principal components

| Principal factor | Eigenvalue | Variance contribution rate /% | Cumulative contribution rate/% |
|------------------|------------|-------------------------------|--------------------------------|
| 1                | 7.428      | 67.528                        | 67.528                         |
| 2                | 3.572      | 32.472                        | 100.00                         |

**Table S4** Principal component load matrix

| Number | Compounds                                                                 | Component |        |
|--------|---------------------------------------------------------------------------|-----------|--------|
|        |                                                                           | 1         | 2      |
| 1      | Benzyl alcohol                                                            | -0.546    | 0.838  |
| 2      | Phenethyl alcohol                                                         | -0.755    | -0.655 |
| 3      | (S,3E,7E)- $\alpha,\alpha,4,8$ -Tetramethyl-3,7-cyclodecadiene-1-methanol | -0.996    | 0.086  |
| 4      | $\alpha$ -cadinol                                                         | -0.998    | 0.058  |
| 5      | Phytol                                                                    | 0.354     | 0.935  |
| 6      | 2-(5-Ethenyl-5-methyloxolan-2-yl)propan-2-ol                              | 0.998     | -0.056 |
| 7      | Bicyclo[3.2.2]nona-6,8-dien-3-one                                         | 0.586     | 0.810  |
| 8      | Fitone                                                                    | 0.471     | -0.882 |
| 9      | Benzaldehyde                                                              | 0.984     | 0.177  |
| 10     | Trans-Cinnamaldehyde                                                      | 0.975     | -0.223 |

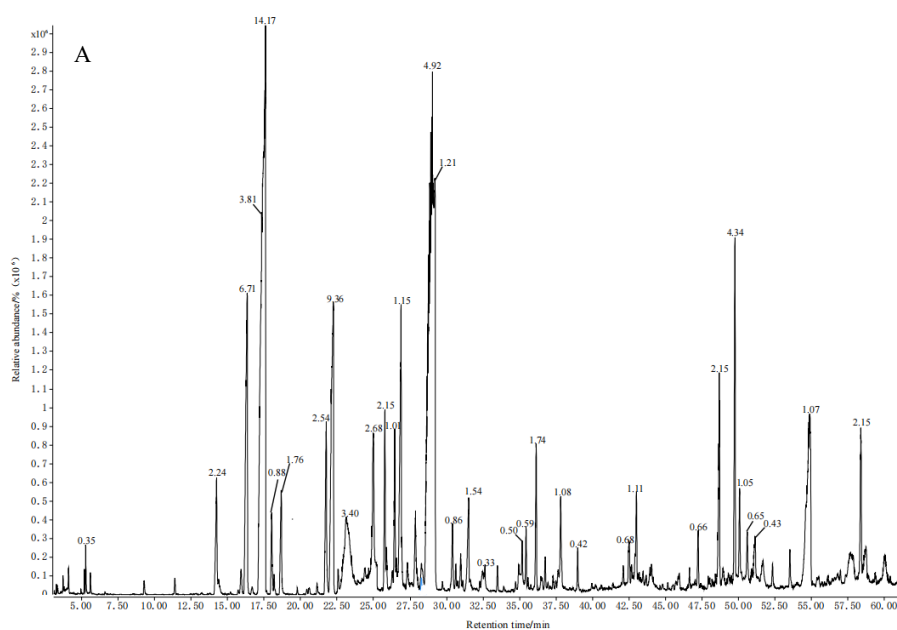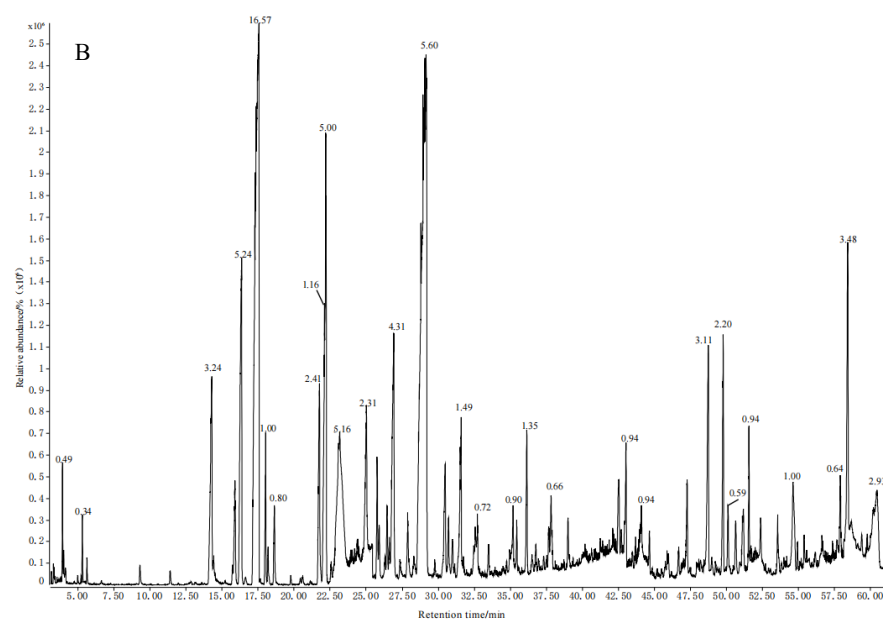



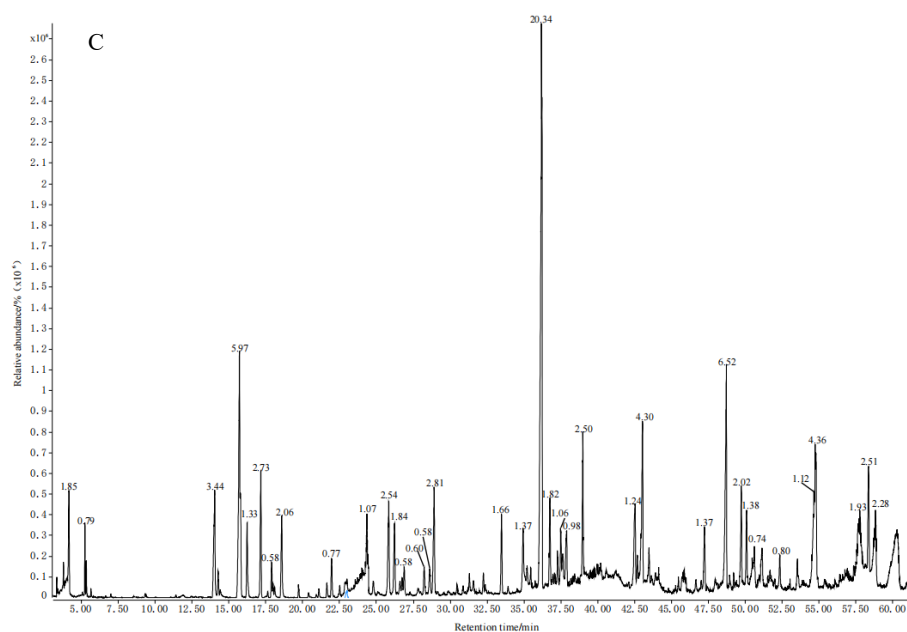

A: Dark-purple petals B: Red petals C: Yellow petals

**Figure S1** GC-MS total ion chromatogram of essential oil from *P. delavayi* flowers with different colors

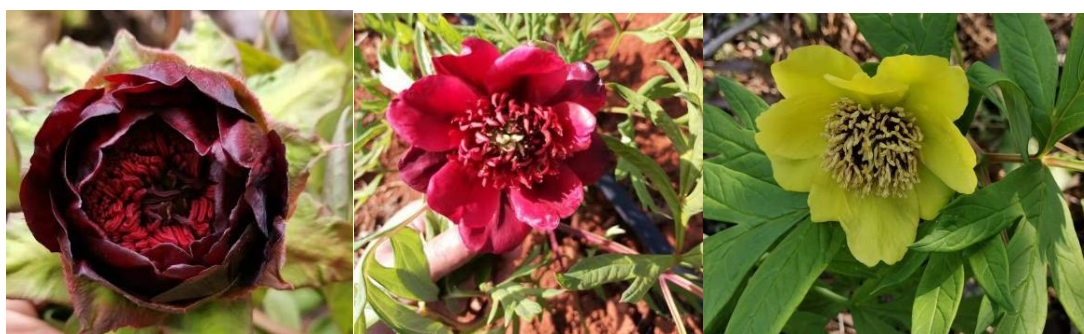

**Figure S2** Test materials of dark-purple , red and yellow flowers of *P. delavayi*
